# Supplementary material for: RASAL2 promotes tumor progression through LATS2/YAP1 axis of hippo signaling pathway in colorectal cancer
Source: Springer Nature journal article supplement (doi:10.1186/s12943-018-0853-6), 2018-07-23
Supplement: MOESM1 [file 15972166]

## Additional file 1

**Table S1. Patients' information in this study**

| NO. | Age (year) | Gender | Histology      | TNM Classification | Site of colon | Metastatic Site | RAS/RAF Mutation | MSI     | Array-CGH | RNA array |
|-----|------------|--------|----------------|--------------------|---------------|-----------------|------------------|---------|-----------|-----------|
| 1   | 64         | M      | Adenocarcinoma | T3N1M0             | Rectum        | Lung            | wt               | MSS     | ✓         | ✓         |
| 2   | 54         | M      | Adenocarcinoma | T3N1M0             | Recto-Sigmoid | Liver           | wt               | MSS     | ✓         |           |
| 3   | 56         | F      | Adenocarcinoma | T3N2M1             | Right         | Liver           | wt               | MSS     | ✓         |           |
| 4   | 61         | M      | Adenocarcinoma | T3N2M0             | Sigmoid       | Liver           | wt               | MSS     | ✓         | ✓         |
| 5   | 40         | F      | Adenocarcinoma | T3N1M0             | Rectum        | Liver           | mut              | MSS     | ✓         | ✓         |
| 6   | 69         | F      | Adenocarcinoma | T2N0M0             | Sigmoid       | Liver           | mut              | MSI-low | ✓         |           |
| 8   | 63         | F      | Adenocarcinoma | T3N0M0             | Sigmoid       | Liver           | mut              | MSI-low | ✓         | ✓         |
| 142 | 73         | F      | Adenocarcinoma | T3N2M0             | Caecum        | Liver           | mut              | MSS     | ✓         |           |

**Table S2. Primers sequence for qPCR and & siRNA/shRNA information**

| <b>Gene</b>    | <b>Sequence</b>                  | <b>Supplier</b>   |
|----------------|----------------------------------|-------------------|
| RASAL2         | Sense: TGTTCTGTCCTTGAGCCAGT      | IDT               |
|                | Anti-sense: TCCACCTCAGACATCACCAA | IDT               |
| $\beta$ -actin | Sense: CGCGAGAAGATGACCCAGAT      | IDT               |
|                | Anti-sense: GTACGGCCAGAGGCGTACAG | IDT               |
| RASAL2_siRNA_1 | CAGGAGGACCTTCTATTCGGA            | Qiagen            |
| RASAL2_siRNA_2 | CGGCGACTGGAG GAATATGAA           | Qiagen            |
| RASAL2_shRNA_1 | AATAAAGAGGAGTTGGCTTGTGCCTTAGT    | TG309931, Origene |
| RASAL2_shRNA_2 | CTCTTATTGCCAAGGTCATTCAGAACCTG    | TG309931, Origene |
| LATS2_siRNA    | CTCCGCAAAGGGTACTACTCAA           | Qiagen            |

IDT, Coralville, IA, USA

Qiagen, Hilden, Germany

Origene, Rockville, MD, USA

**Table S3. DNA plasmids**

| <b>DNA plasmid name</b>  | <b>Objective</b>       | <b>Selectable marker</b> | <b>Restriction Enzyme cutting site</b> | <b>Primer</b> | <b>Sequence of Primer</b>   |
|--------------------------|------------------------|--------------------------|----------------------------------------|---------------|-----------------------------|
| pcDNA3.1(+)/RASAL2       | Transient transfection | Ampicillin               | EcoRV                                  | Sense         | CGTgatatcAGCTCTCTCCGTCGTCC  |
|                          |                        |                          | XhoI                                   | Anti-Sense    | ATTctcgagTCAGCAGCTGCTG      |
| pLPCX-RASAL2             | Stable clone           | Ampicillin and Puromycin | XhoI                                   | Sense         | ATTctcgagAGCTCTCTCCGTCGTCC  |
|                          |                        |                          | NotI                                   | Anti-Sense    | ATTGcggccgCTCAGCAGCTGCTG    |
| pLPCX-Firefly luciferase | Stable clone           | Ampicillin and Puromycin | BglII                                  | Sense         | CCGagatctCACCATGGAAGACGCCAA |
|                          |                        |                          | HindIII                                | Anti-Sense    | GGGaagcttTCATCACTCGAGCAATTT |

**Table S4. Copy number gain of 1q specially in metastases**

| <b>Sample ID</b>              | <b>chrom</b> | <b>arm</b> | <b>start. position</b> | <b>end. position</b> |
|-------------------------------|--------------|------------|------------------------|----------------------|
| <b>Patient 8 Metastasis</b>   | 1            | q          | 169229095              | 215258644            |
| <b>Patient 8 Metastasis</b>   | 1            | q          | 169229095              | 235592711            |
| <b>Patient 8 Metastasis</b>   | 1            | q          | 169229095              | 228351874            |
| <b>Patient 5 Metastasis</b>   | 1            | q          | 169229095              | 169241274            |
| <b>Patient 5 Metastasis</b>   | 1            | q          | 169229095              | 225134351            |
| <b>Patient 4 Metastasis</b>   | 1            | q          | 196711595              | 196780309            |
| <b>Patient 2 Metastasis</b>   | 1            | q          | 152569860              | 152586234            |
| <b>Patient 142 Metastasis</b> | 1            | q          | 242081818              | 242185893            |

**Table S5. Folder changes of RASAL2 in primary and metastatic tumor by expression microarray analysis.**

| <b>Gene Symbol</b> | <b>Expression Array</b> |         |          | <b>ACCESSION</b> |
|--------------------|-------------------------|---------|----------|------------------|
|                    | T/N. fc                 | M/N. fc | M/T. fc  |                  |
| RASAL2             | 1.23569                 | 1.49516 | 1.209976 | NM_170692.1      |

**Table S6. Clinicopathological correlation of RASAL2 expression in CRC (n = 208, significant P-value in bold and *Italic* format)**

|                                     | All (n=208)   | RASAL2       |               | P-value      |
|-------------------------------------|---------------|--------------|---------------|--------------|
|                                     |               | Positive     | Negative      |              |
| Male gender                         | 113 (54.3%)   | 42 (50.0%)   | 71 (57.3%)    | 0.302        |
| Age at operation (years, mean ± SD) | 67.1 ± 12.4   | 65.7 ± 13.6  | 68.0 ± 11.4   | 0.187        |
| Location                            |               |              |               | 0.371        |
| Right colon                         | 63 (30.3%)    | 25 (29.8%)   | 38 (30.6%)    |              |
| Left colon                          | 47 (22.6%)    | 23 (27.4%)   | 24 (19.4%)    |              |
| Rectum                              | 98 (47.1%)    | 36 (42.9%)   | 62 (50.0%)    |              |
| Size (cm, mean ± SD)                | 4.4 ± 1.7     | 4.3 ± 1.7    | 4.5 ± 1.7     | 0.406        |
| AJCC stage                          |               |              |               | <b>0.018</b> |
| I                                   | 18 (8.7%)     | 6 (7.1%)     | 12 (9.7%)     |              |
| II                                  | 63 (30.3%)    | 17 (20.2%)   | 46 (37.1%)    |              |
| III                                 | 60 (28.8%)    | 25 (29.8%)   | 35 (28.2%)    |              |
| IV                                  | 67 (32.2%)    | 36 (42.9%)   | 31 (25.0%)    |              |
| T stage                             |               |              |               | 0.084        |
| T1                                  | 5 (2.4%)      | 3 (3.6%)     | 2 (1.6%)      |              |
| T2                                  | 21 (10.1%)    | 10 (11.9%)   | 11 (8.9%)     |              |
| T3                                  | 135 (64.9%)   | 46 (54.8%)   | 89 (71.8%)    |              |
| T4                                  | 47 (22.6%)    | 25 (29.8%)   | 22 (17.7%)    |              |
| N stage                             |               |              |               | <b>0.013</b> |
| N0                                  | 95 (45.7%)    | 28 (33.3%)   | 67 (54.0%)    |              |
| N1                                  | 66 (31.7%)    | 33 (39.3%)   | 33 (26.6%)    |              |
| N2                                  | 47 (22.6%)    | 23 (27.4%)   | 24 (19.4%)    |              |
| M stage                             |               |              |               | <b>0.007</b> |
| M0                                  | 141 (67.8%)   | 48 (57.1%)   | 93 (75.0%)    |              |
| M1                                  | 67 (32.2%)    | 36 (42.9%)   | 31 (25.0%)    |              |
| Pre-ops CEA (ng/mL, mean ± SD)      | 124.2 ± 733.1 | 90.7 ± 337.1 | 146.9 ± 909.1 | 0.588        |

**Table S7. Univariate and multivariate cox regression analysis of clinicopathologic factors with overall survival in CRC patients (n = 208, significant *P*-value in bold and Italic format).**

| Overall survival                             | Univariate |              |                  | Multivariate |             |                  |
|----------------------------------------------|------------|--------------|------------------|--------------|-------------|------------------|
|                                              | HR         | 95% CI       | P-value          | HR           | 95% CI      | P-value          |
| Male gender                                  | 1.228      | 0.863-1.747  | 0.253            |              |             |                  |
| Age at operation (years)                     | 1.001      | 0.986-1.016  | 0.926            |              |             |                  |
| Location (right colon vs. left colon/rectum) | 0.969      | 0.652-1.440  | 0.876            |              |             |                  |
| Size (cm)                                    | 1.032      | 0.933-1.142  | 0.538            |              |             |                  |
| T stage (T4 vs. T1/T2/T3)                    | 2.871      | 1.957-4.212  | <b>&lt;0.001</b> | 0.995        | 0.992-0.999 | <b>0.012</b>     |
| N stage (N1/N2 vs. N0)                       | 3.243      | 2.200-4.782  | <b>&lt;0.001</b> | 1.934        | 1.244-3.006 | <b>0.003</b>     |
| M stage (M1 vs. M0)                          | 7.280      | 4.928-10.756 | <b>&lt;0.001</b> | 5.515        | 3.408-8.927 | <b>&lt;0.001</b> |
| Pre-ops CEA >10 ng/mL                        | 2.608      | 1.792-3.795  | <b>&lt;0.001</b> | 1.267        | 0.838-1.917 | 0.262            |
| RASAL2, H-score > 100                        | 1.684      | 1.180-2.404  | <b>0.004</b>     | 1.561        | 1.074-2.269 | <b>0.02</b>      |

**Table S8. Univariate and multivariate cox regression analysis of nuclear YAP1 with overall survival in CRC patients**  
(significant *P*-value in bold and Italic format).

| Overall survival                             | Univariate |              |                  | Multivariate |              |                  |
|----------------------------------------------|------------|--------------|------------------|--------------|--------------|------------------|
|                                              | HR         | 95% CI       | <i>P</i> -value  | HR           | 95% CI       | <i>P</i> -value  |
| Male gender                                  | 1.228      | 0.863-1.747  | 0.253            |              |              |                  |
| Age at operation (years)                     | 1.001      | 0.986-1.016  | 0.926            |              |              |                  |
| Location (right colon vs. left colon/rectum) | 0.969      | 0.652-1.440  | 0.876            |              |              |                  |
| Size (cm)                                    | 1.032      | 0.933-1.142  | 0.538            |              |              |                  |
| T stage (T4 vs. T1/T2/T3)                    | 2.871      | 1.957-4.212  | <b>&lt;0.001</b> | 0.996        | 0.992-1.000  | <b>0.045</b>     |
| N stage (N1/N2 vs. N0)                       | 3.243      | 2.200-4.782  | <b>&lt;0.001</b> | 1.058        | 1.016-1.102  | <b>0.007</b>     |
| M stage (M1 vs. M0)                          | 7.280      | 4.928-10.756 | <b>&lt;0.001</b> | 6.753        | 3.801-11.998 | <b>&lt;0.001</b> |
| Pre-ops CEA >10 ng/mL                        | 2.608      | 1.792-3.795  | <b>&lt;0.001</b> | 1.171        | 0.725-1.893  | 0.518            |
| RASAL2, H-score > 100                        | 1.684      | 1.180-2.404  | <b>0.004</b>     | 1.563        | 1.004-2.433  | <b>0.048</b>     |
| Nuclear YAP1 positive                        | 1.684      | 1.124-2.525  | <b>0.012</b>     | 1.131        | 0.705-1.813  | 0.609            |
