# Supplementary material for: RASAL2 promotes tumor progression through LATS2/YAP1 axis of hippo signaling pathway in colorectal cancer
Source: Springer Nature journal article supplement (doi:10.1186/s12943-018-0853-6), 2018-07-23
Supplement: MOESM2 [file 15972166]

# Additional file 2

## Figure S1

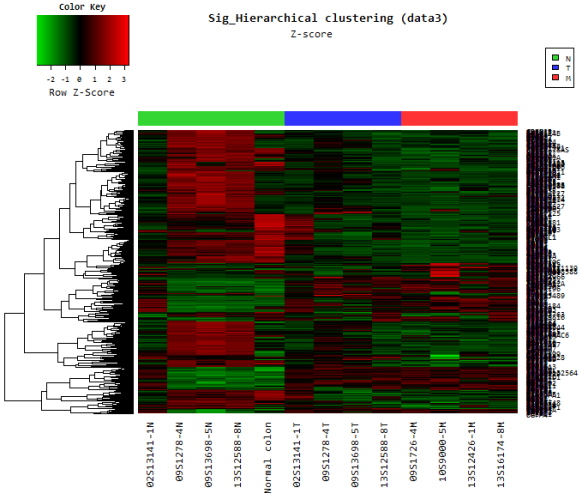

Figure S1 Hierarchical clustering of Illumina expression array in human CRC samples.

## Figure S2

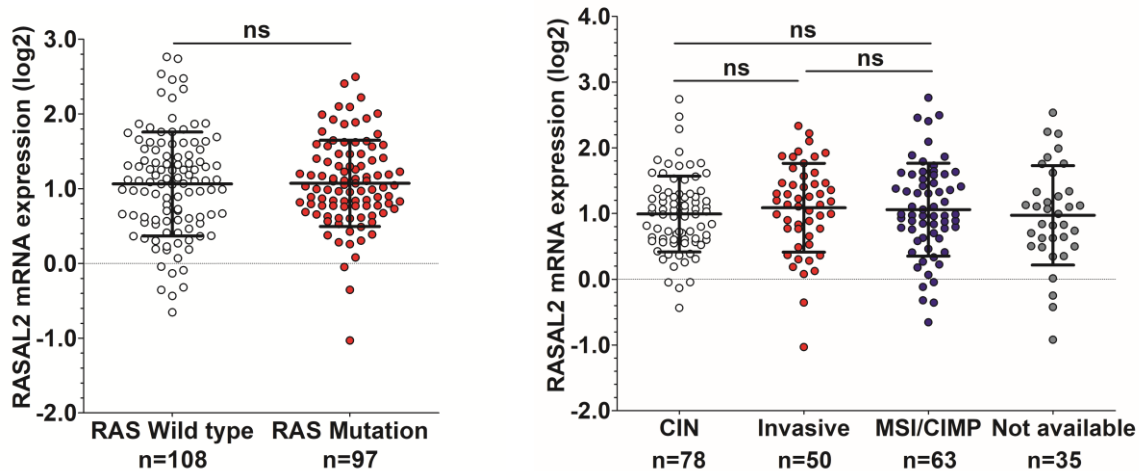

**Figure S2** RASAL2 expression of CRC in TCGA cohort. Distribution of RASAL2 mRNA expression in *KRAS/NRAS* wild type and mutated tumors and in four gene expression subtypes of CRC for TCGA cohort (Nature 2012). ns: no significant.

# Figure S3

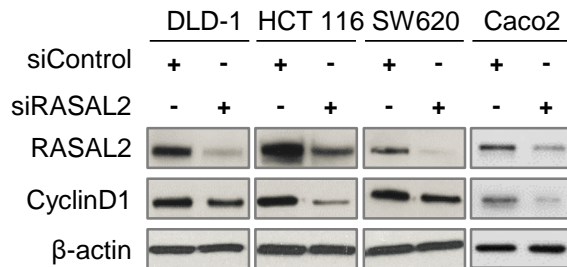

**Figure S3** Western blot analysis for CyclinD1 in cells with RASAL2 knockdown. Western blot analysis confirmed that siRASAL2 suppressed the G1-S transition promoter cyclin D1, confirming the effect of siRASAL2 in blocking the cell cycle at the G1/S checkpoint.

# Figure S4

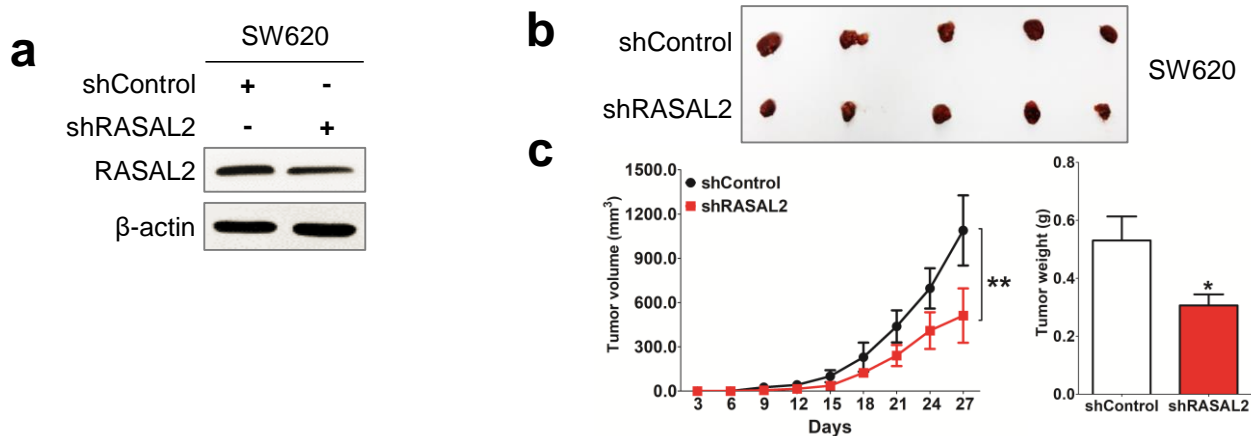

**Figure S4** shRASAL2 inhibited tumor growth in nude mice growth in vivo. **a** Knockdown efficiency of RASAL2 in stable shRASAL2 downregulated SW620 cells was demonstrated by western blot. **b** A representative picture of tumor formation in nude mice subcutaneous inoculated with shRASAL2 or Control. **c** The tumor growth curve (Left) and tumor weight (Right) of SW620 stably transduced with shRASAL2 in nude mice was significantly dampened compared with Control cells. \* $P < 0.05$ ; \*\* $P < 0.01$ .

# Figure S5

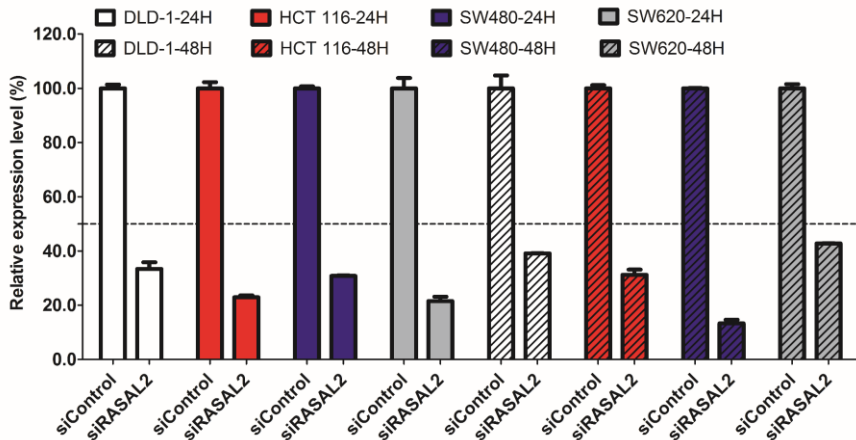

**Figure S5** RASAL2 RNA expression by siRNA knockdown in CRCs. Successful knockdown of RASAL2 by siRNA was confirmed by qRT-PCR and the knock down efficiency ranged from 13.3% to 42.8%.  $\beta$ -actin was used as internal control.

# Figure S6

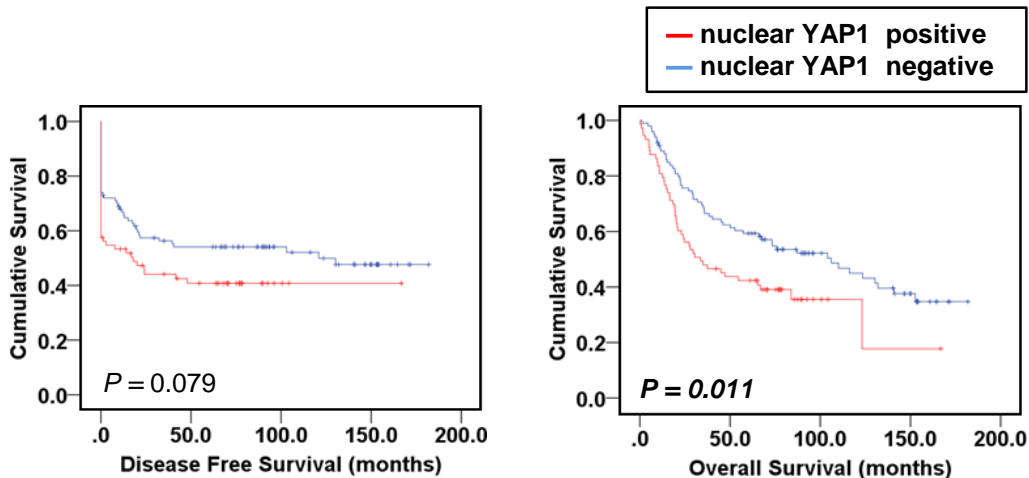

**Figure S6** Kaplan-Meier survival analysis of nuclear YAP1 expression in CRC patients. Kaplan-Meier curve showed upregulation of nuclear YAP1 predicted significantly poorer overall survival in the local CRC patients ( $P = 0.011$ ).
